# Supplementary material
Source: ML conference proceedings conference paper supplement (https://openaccess.thecvf.com/content/CVPR2023/html/Li_Robust_Model-Based_Face_CVPR_2023_paper.html)
Supplement: Supplementary file 1 [file Li_Robust_Model-Based_Face_CVPR_2023_supplemental.zip]

Archive with 2 entries (2 files):
- 2023064860.pdf
- video_v2_20230320_540p_compressed.mp4
